# Supplementary material for: One-pot synthesis of C8 aldehydes/alcohols from propylene using eco-friendly hydrotalcite supported HRhCO(PPh3)3 catalyst
Source: Royal Society of Chemistry journal article supplement (doi:10.1039/b616977e), 2007-01-01
Supplement: b616977e.pdf [file b616977e.pdf]

**Figure Captions:**

**Fig. S1.**  $^{31}\text{P}$  FT-NMR of [HF] complex in  $\text{C}_6\text{D}_6$ .

**Fig. S2** P-XRD patterns of [HF] complex, [HT(3.5)] and [HF/HT(X)].

**Fig. S3.** SEM images of [HT(3.5)] and [HF/HT(3.5)].

**Fig. S4.** TGA of [HT(3.5)], [HF] Complex and [HF/HT(3.5)].

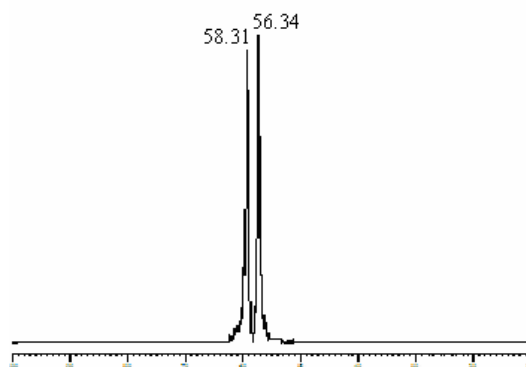

**Fig. S1**  $^{31}\text{P}$  FT-NMR of [HF] complex in  $\text{C}_6\text{D}_6$ .

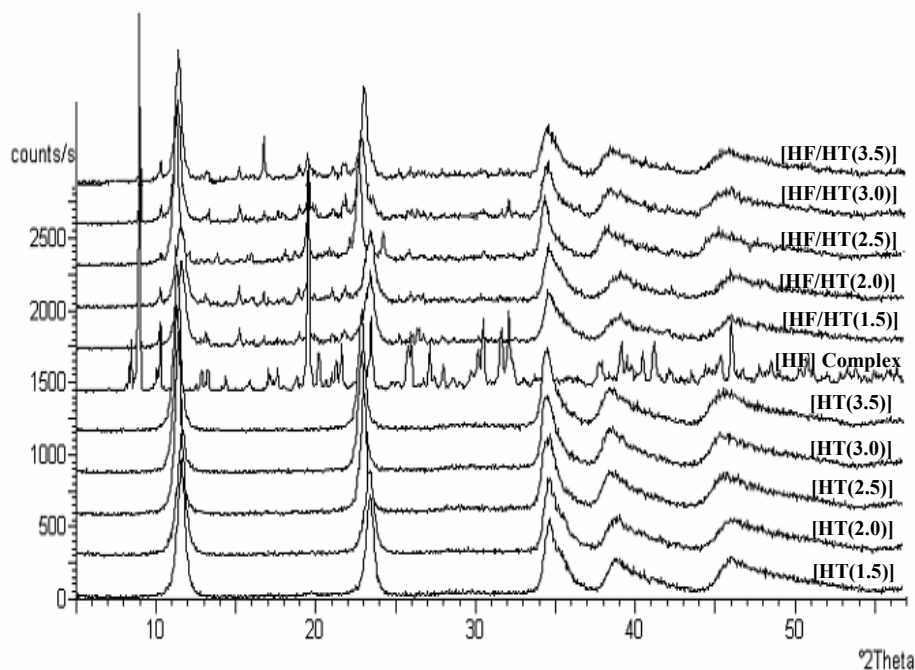

**Fig. S2** P-XRD patterns of [HF] complex, [HT(3.5)] and [HF/HT(X)] system.

# Supplementary Material (ESI) for New Journal of Chemistry  
# This journal is (c) The Royal Society of Chemistry and  
# The Centre National de la Recherche Scientifique, 2007

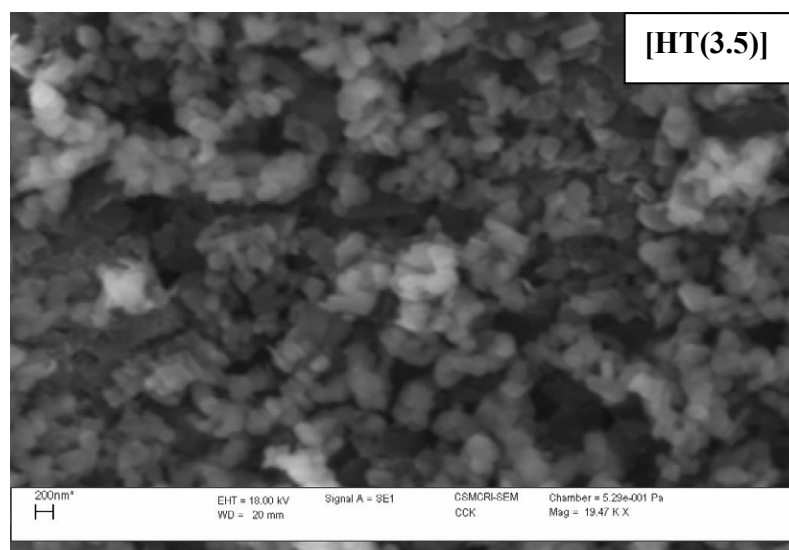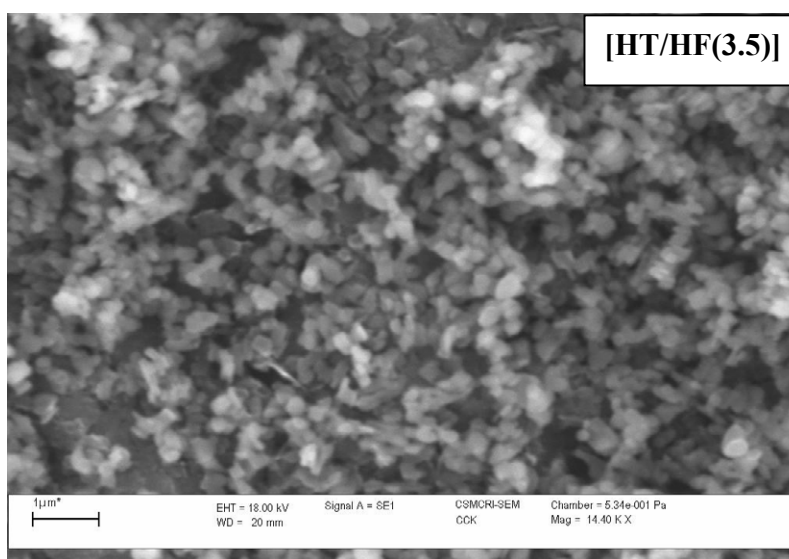

**Fig. S3** SEM images of [HT(3.5)] and [HF/HT(3.5)].

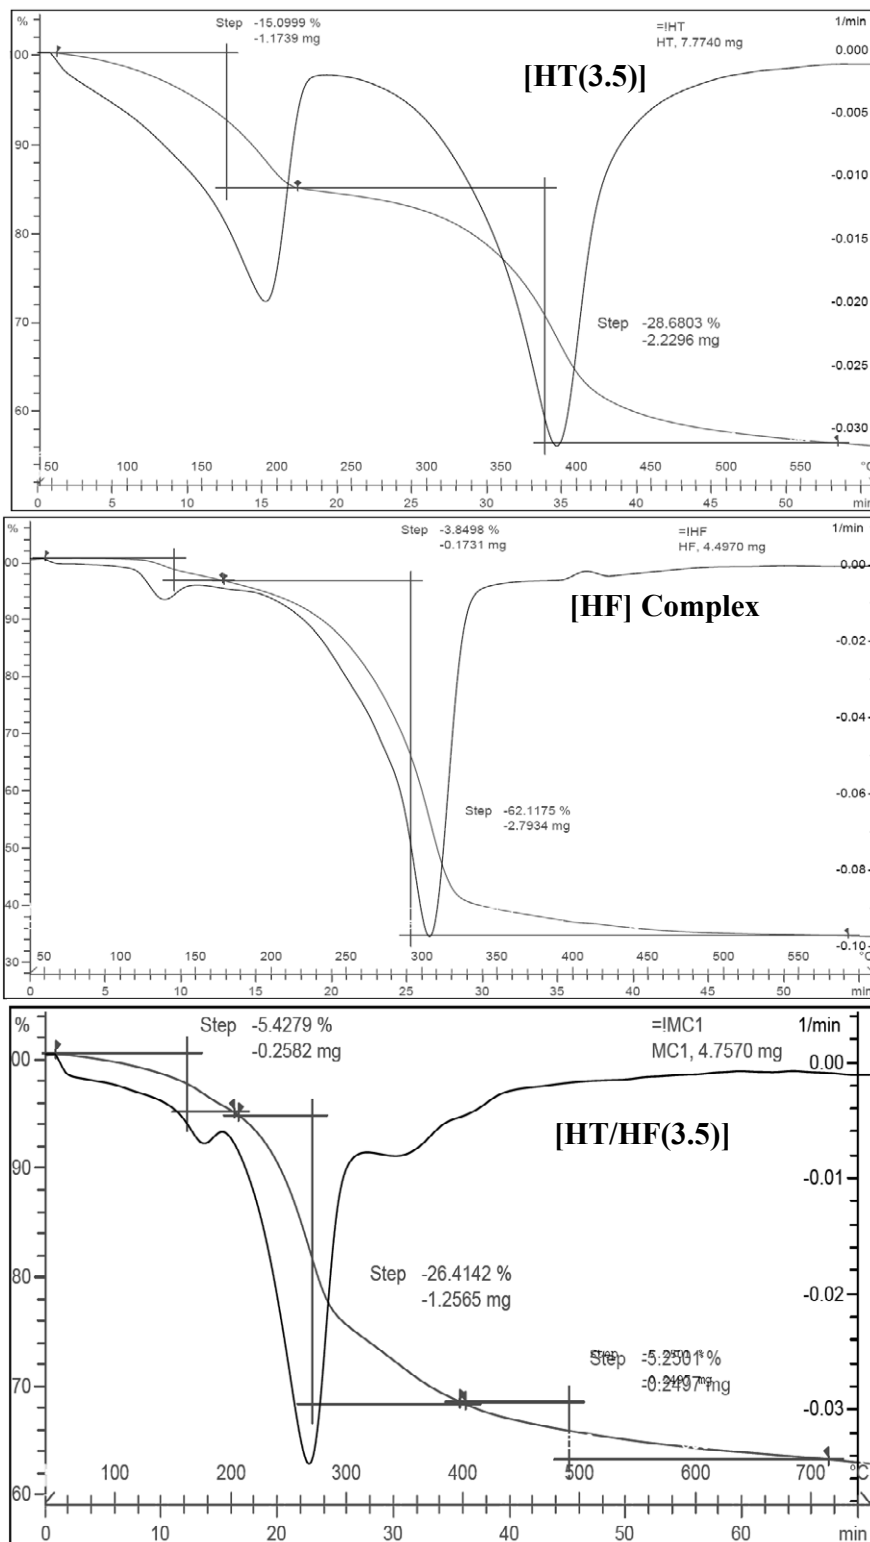

Fig. S4 TGA of [HT(3.5)], [HF] Complex and [HT/HF(3.5)].
